# Supplementary material for: Anti-idiotypic antibodies elicit anti-HIV-1–specific B cell responses
Source: PubMed Central journal article supplement (PMC6780999; doi:10.1084/jem.20190446), 2019-07-25
Supplement: JEM_20190446_sm.pdf [file JEM_20190446_sm.pdf]

## Supplemental material

Dosenovic et al., <https://doi.org/10.1084/jem.20190446>

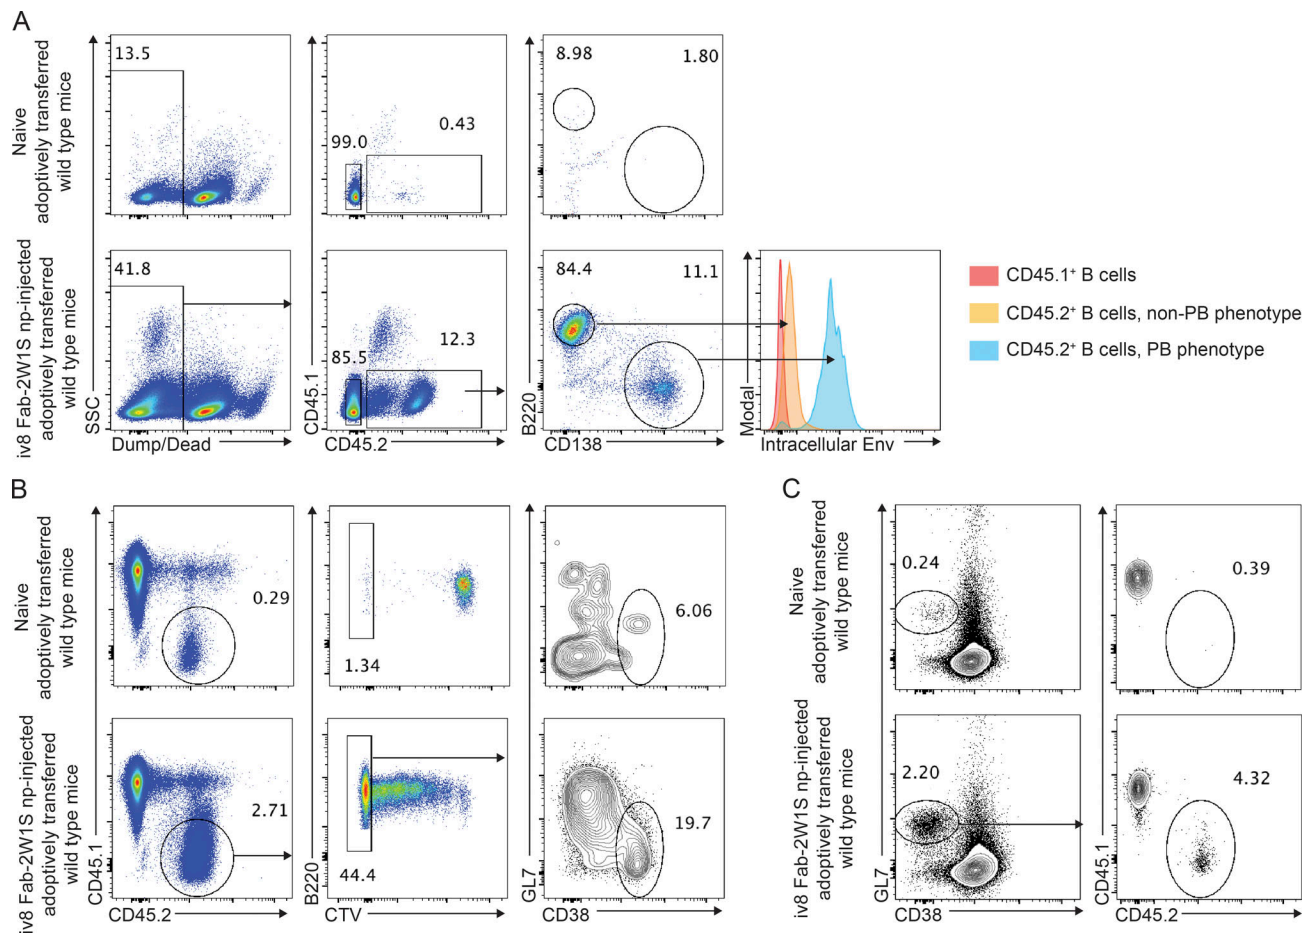

Figure S1. **Flow cytometric gating strategies for enumeration of B cells after injection of iv8 Fab-2W1S and N276D-2W1S nanoparticles. (A)** Gating strategy for enumeration of 3BNC60<sup>SI</sup> plasmablasts (PB; CD45.2<sup>+</sup>, CD138<sup>+</sup>, B220<sup>-</sup>, intracellular Env<sup>high</sup>) in adoptively transferred wild-type mice 5 d after injection of iv8 Fab-2W1S and N276D-2W1S nanoparticles. Cells were pregated on live lymphocytes and singlets. SSC, side scatter. **(B)** Gating strategy for enumeration of 3BNC60<sup>SI</sup> early memory B cells (mB; CD45.2<sup>+</sup>, CTV<sup>-</sup>, CD38<sup>+</sup>, GL7<sup>-</sup>) in adoptively transferred wild-type mice 5 d after injection of iv8 Fab-2W1S and N276D-2W1S nanoparticles. Cells were pregated on lymphocytes, singlets, and live B220<sup>+</sup> B cells. **(C)** Gating strategy for enumeration of 3BNC60<sup>SI</sup> GC cells (CD45.2<sup>+</sup>, CD95<sup>+</sup>, CD38<sup>-</sup>) in adoptively transferred wild-type mice. Cells were pregated on lymphocytes, singlets, and live B220<sup>+</sup> B cells.

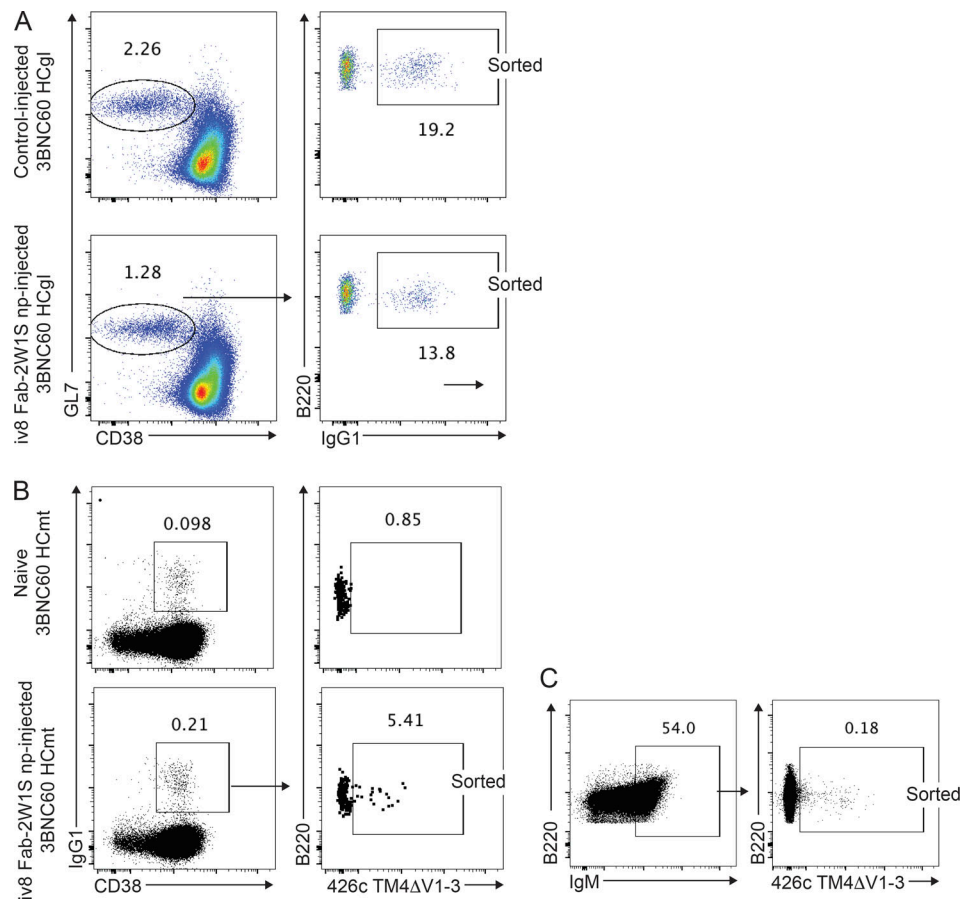

Figure S2. **Flow cytometry gating strategy for single-cell sorting of heavy-chain knock-in mice. (A)** Flow cytometry gating strategy for single-cell sorting of IgG1<sup>+</sup> GC B cells 14 d after injection of 3BNC60 HCgl mice with control iv1 Fab-2W1S nanoparticles (top panels) or iv8 Fab-2W1S nanoparticles (bottom panels). Cells were pre-gated on lymphocytes, singlets, or live B220<sup>+</sup> B cells. **(B)** Flow cytometry gating strategy for the identification of Env-specific (426c TM4ΔV1-3) memory B cells in naive (top panels) or iv8 Fab-2W1S nanoparticle-injected 3BNC60 HCmt mice (bottom panels) 42 d after injection. Cells were pre-gated on lymphocytes, singlets, live B cells, or IgM<sup>-</sup>. **(C)** Flow cytometry gating for the isolation of single naive B cells from 3BNC60 HCmt mice binding to HIV-1 Env (426c TM4ΔV1-3). Cells were pre-gated on lymphocytes, singlets, or live B cells.

Table S1. **Data collection and refinement statistics for iv8scFv + gIVRC01scFv**

| <b>Data collection</b>                                  |                                        |
|---------------------------------------------------------|----------------------------------------|
| Space group                                             | P1                                     |
| Cell dimensions                                         |                                        |
| <i>a</i> , <i>b</i> , <i>c</i> (Å)                      | 51.583, 107.937, 116.961               |
| $\alpha$ , $\beta$ , $\gamma$ (°)                       | 85.489, 80.276, 84.172                 |
| Resolution (Å)                                          | 50–2.419 (2.506–2.42) <sup>a</sup>     |
| <i>R</i> <sub>sym</sub> or <i>R</i> <sub>merge</sub>    | 0.059 (0.169) <sup>a</sup>             |
| <i>I</i> / <i>s</i>                                     | 10.2 (2.8) <sup>a</sup>                |
| Completeness (%)                                        | 92.0 (50.2) <sup>a</sup>               |
| Redundancy                                              | 1.7 (1.4) <sup>a</sup>                 |
| CC1/2                                                   | (0.952) <sup>a</sup>                   |
| <b>Refinement</b>                                       |                                        |
| Resolution (Å)                                          | 49.78–2.419 (2.506–2.419) <sup>a</sup> |
| No. reflections                                         | 87,138 (5,909)                         |
| <i>R</i> <sub>work</sub> / <i>R</i> <sub>free</sub> (%) | 17.43/22.40 (21.65/27.10) <sup>a</sup> |
| No. atoms                                               |                                        |
| Protein                                                 | 14,355                                 |
| Water                                                   | 1,152                                  |
| Ligand                                                  | 184                                    |
| B-factors (Å <sup>2</sup> )                             |                                        |
| Protein                                                 | 33.35                                  |
| Water                                                   | 36.56                                  |
| Ligand                                                  | 53.41                                  |
| Root mean square deviations                             |                                        |
| Bond lengths (Å)                                        | 0.003                                  |
| Bond angles (°)                                         | 0.96                                   |
| Ramachadran favored %                                   | 96.98                                  |
| Ramachadran outliers %                                  | 0.00                                   |
| MolProbity all-atoms clashscore                         | 3.25                                   |
| <b>Protein Data Bank ID</b>                             | 6OL7                                   |

$R_{\text{sym}} = R_{\text{merge}} = [\sum_h \sum_i |I_h - I_{hi}| / \sum_h \sum_i I_{hi}]$  where  $I_h$  is the mean of  $I_{hi}$  observations of reflections  $h$ .  $R_{\text{work}} = \sum ||F_{\text{obs}}| - |F_{\text{calc}}|| / \sum |F_{\text{obs}}|$  for 95% of recorded data.  $R_{\text{free}} = \sum ||F_{\text{obs}}| - |F_{\text{calc}}|| / \sum |F_{\text{obs}}|$  for 5% of recorded data. *I*/*s*, signal to noise ratio.

<sup>a</sup>Statistics for the highest resolution shell are shown in parentheses.

**Table S2. Detailed interactions between gIVRC01 and iv8**

**a. Detailed interactions of gIVRC01 light chain with iv8 heavy chain**

| gIVRC01 Light Chain |      |        |       | iv8 Heavy Chain |      |        |        | Hydrogen Bonds |           |                 |
|---------------------|------|--------|-------|-----------------|------|--------|--------|----------------|-----------|-----------------|
|                     | HSDC | ASA    | BSA   |                 | HSDC | ASA    | BSA    |                | Dist. [Å] |                 |
| L:SER 28            | H    | 89.59  | 23.35 | A:ALA 33        |      | 24.26  | 2.51   | L:ASP 50[ O ]  | 3.17      | A:ASN 52[ ND2]  |
| L:VAL 29            |      | 64.20  | 0.49  | A:ASN 52        | H    | 43.98  | 36.57  | L:SER 52[ OG ] | 2.88      | A:ASN 52[ ND2]  |
| L:SER 30            |      | 96.21  | 31.64 | A:ASN 52A       | H    | 56.14  | 32.65  | L:ASN 53[ OD1] | 2.86      | A:ASN 52A[ ND2] |
| L:SER 31            |      | 30.91  | 12.67 | A:ASN 53        | H    | 120.69 | 37.55  | L:SER 52[ O ]  | 2.69      | A:ASN 53[ ND2]  |
| L:TYR 32            | H    | 165.01 | 68.50 | A:GLY 55        | H    | 72.55  | 54.07  | L:GLY 68[ O ]  | 2.87      | A:TYR 56[ OH ]  |
| L:TYR 49            |      | 102.29 | 0.78  | A:TYR 56        | H    | 120.29 | 71.62  | L:GLY 66[ O ]  | 3.39      | A:THR 57[ N ]   |
| L:ASP 50            | H    | 60.26  | 34.24 | A:THR 57        | H    | 53.73  | 28.53  | L:SER 28[ OG ] | 2.99      | A:HIS 58[ NE2]  |
| L:ALA 51            |      | 18.98  | 11.80 | A:HIS 58        |      | 90.31  | 47.65  | L:ASN 53[ ND2] | 3.13      | A:ASN 52A[ OD1] |
| L:SER 52            | H    | 66.81  | 51.92 | A:TYR 59        |      | 23.23  | 1.61   | L:GLY 66[ N ]  | 2.79      | A:GLY 55[ O ]   |
| L:ASN 53            | H    | 55.62  | 43.51 | A:TYR 97        | H    | 154.18 | 24.79  | L:GLY 68[ N ]  | 2.99      | A:THR 57[ O ]   |
| L:GLY 64            |      | 8.20   | 0.61  | A:TRP 98        |      | 213.44 | 100.02 | L:TYR 32[ OH ] | 3.77      | A:TYR 97[ O ]   |
| L:SER 65            |      | 62.92  | 11.05 |                 |      |        |        |                |           |                 |
| L:GLY 66            | H    | 43.27  | 34.64 |                 |      |        |        |                |           |                 |
| L:SER 67            |      | 84.67  | 17.84 |                 |      |        |        |                |           |                 |
| L:GLY 68            | H    | 65.72  | 57.00 |                 |      |        |        |                |           |                 |
| L:THR 69            |      | 40.69  | 0.84  |                 |      |        |        |                |           |                 |
| L:PHE 71            |      | 20.20  | 10.01 |                 |      |        |        |                |           |                 |
| L:TYR 91            |      | 130.01 | 19.46 |                 |      |        |        |                |           |                 |

**b. Detailed interactions of gIVRC01 light chain with iv8 light chain**

| gIVRC01 Light Chain |      |        |       | iv8 Light Chain |      |        |       | Hydrogen Bonds |           |                 |
|---------------------|------|--------|-------|-----------------|------|--------|-------|----------------|-----------|-----------------|
|                     | HSDC | ASA    | BSA   |                 | HSDC | ASA    | BSA   |                | Dist. [Å] |                 |
| L:ILE 2             |      | 10.48  | 4.53  | Q:GLN 27        |      | 87.15  | 5.15  | L:SER 30[ N ]  | 2.85      | Q:TYR 92[ O ]   |
| L:GLN 27            |      | 101.49 | 28.48 | Q:TYR 27D       | H    | 94.17  | 77.59 | L:SER 30[ OG ] | 2.76      | Q:PHE 91[ O ]   |
| L:SER 28            | H    | 89.59  | 56.79 | Q:SER 27E       |      | 97.78  | 3.27  | L:TYR 91[ OH ] | 2.65      | Q:TYR 32[ OH ]  |
| L:VAL 29            |      | 64.20  | 57.48 | Q:GLY 27F       |      | 58.07  | 6.89  | L:GLU 96[ N ]  | 3.32      | Q:TYR 27D[ OH ] |
| L:SER 30            | H    | 96.21  | 64.57 | Q:ASN 28        |      | 60.44  | 8.80  | L:SER 28[ O ]  | 3.13      | Q:TYR 94[ N ]   |
| L:SER 31            |      | 30.91  | 0.58  | Q:TYR 32        | H    | 34.96  | 19.92 | L:SER 30[ OG ] | 2.73      | Q:TRP 96[ NE1]  |
| L:TYR 91            | H    | 130.01 | 58.16 | Q:PHE 91        | H    | 45.37  | 7.31  | L:GLU 96[ OE2] | 2.72      | Q:TYR 27D[ OH ] |
| L:GLU 96            | H    | 135.97 | 33.54 | Q:TYR 92        | H    | 76.06  | 58.04 |                |           |                 |
| L:PHE 97            |      | 44.92  | 12.23 | Q:PHE 93        |      | 60.83  | 37.01 |                |           |                 |
|                     |      |        |       | Q:TYR 94        | H    | 169.30 | 68.44 |                |           |                 |
|                     |      |        |       | Q:TRP 96        | H    | 122.56 | 7.44  |                |           |                 |

**c. Detailed interactions of gIVRC01 heavy chain with iv8 light chain**

| gIVRC01 Heavy Chain |      |        |       | iv8 Light Chain |      |        |       | Hydrogen Bonds |           |                |
|---------------------|------|--------|-------|-----------------|------|--------|-------|----------------|-----------|----------------|
|                     | HSDC | ASA    | BSA   |                 | HSDC | ASA    | BSA   |                | Dist. [Å] |                |
| H:TRP 47            |      | 64.81  | 4.53  | Q:TYR 27D       |      | 94.17  | 16.58 | H:ASN 58[ ND2] | 2.70      | Q:SER 27E[ O ] |
| H:TRP 50            | H    | 51.04  | 30.75 | Q:SER 27E       | H    | 97.78  | 11.85 | H:ASN 58[ ND2] | 3.02      | Q:GLY 27F[ O ] |
| H:THR 57            |      | 55.30  | 7.13  | Q:GLY 27F       | H    | 58.07  | 51.18 | H:TRP 50[ NE1] | 2.75      | Q:GLY 27F[ O ] |
| H:ASN 58            | H    | 67.19  | 47.27 | Q:ASN 28        |      | 60.44  | 23.07 |                |           |                |
| H:TRP 100B          |      | 114.31 | 47.15 | Q:GLN 29        |      | 147.98 | 46.23 |                |           |                |

**d. Detailed interactions of gIVRC01 heavy chain with iv8 heavy chain**

| gIVRC01 Heavy Chain |      |        |       | iv8 Heavy Chain |      |        |       | Hydrogen Bonds |           |                |
|---------------------|------|--------|-------|-----------------|------|--------|-------|----------------|-----------|----------------|
|                     | HSDC | ASA    | BSA   |                 | HSDC | ASA    | BSA   |                | Dist. [Å] |                |
| H:ASP 99            | H    | 130.70 | 31.05 | A:TYR 97        | H    | 154.18 | 52.44 | H:ASP 99[ O ]  | 2.49      | A:TYR 97[ OH ] |
| H:TYR 100           |      | 123.36 | 33.83 | A:TRP 98        |      | 213.44 | 20.27 |                |           |                |

HSDC, hydrogen/disulphide bond, salt bridge or covalent link; ASA, accessible surface area, Å<sup>2</sup>; BSA, buried surface area, Å<sup>2</sup>; ||||, buried area percentage, one bar per 10%.

Table S3. Kinetics of iv8-binding to 3BNC60<sup>S1</sup> determined by BLI

| $K_D$ (M)             | $k_{on}$ ( $M^{-1} s^{-1}$ ) | $k_{on}$ error     | $k_{off}$ ( $s^{-1}$ ) | $k_{off}$ error       |
|-----------------------|------------------------------|--------------------|------------------------|-----------------------|
| $2.11 \times 10^{-9}$ | $1.26 \times 10^5$           | $9.10 \times 10^2$ | $2.66 \times 10^{-4}$  | $2.02 \times 10^{-6}$ |

$K_D$ , dissociation constant;  $k_{on}$ , association rate;  $k_{off}$ , dissociation rate.

Tables S4–S7 are provided online as separate Excel files. Table S4 list IgL sequences from two single cell-sorted control-injected 3BNC60 HCgl knock-in mice. Table S5 lists IgL sequences from two single cell-sorted iv8 Fab-2W1S-injected 3BNC60 HCgl mice. Table S6 lists IgL sequences from one single cell-sorted naive 3BNC60 HCmt mouse. Table S7 lists IgL sequences from one single cell-sorted iv8 Fab-2W1S-injected 3BNC60 HCmt mouse.
